# Supplementary material
Source: publisher site journal article supplement (https://www.spandidos-publications.com/2047/downloadSupplementary)
Supplement: Supplementary file 1 [file downloadSupplementary]

Figure S1. Wnt5a expression in liver cancer cell lines. (A) Expression levels of Wnt5a in liver cancer cell lines (HLE, HLF, HepG2 and Huh7) were examined by western blotting. (B) Expression levels of Wnt5a in relation to GAPDH expression as a control. The intensity ratio of expression to GAPDH was 20.2% in HLE, 23.5% in HLF, 40.2% in HepG2 and 85.5% in Huh7 cells. Wnt5a expression was lower in poorly-differentiated HLE and HLF cells than in well-differentiated HepG2 and Huh7 cells.

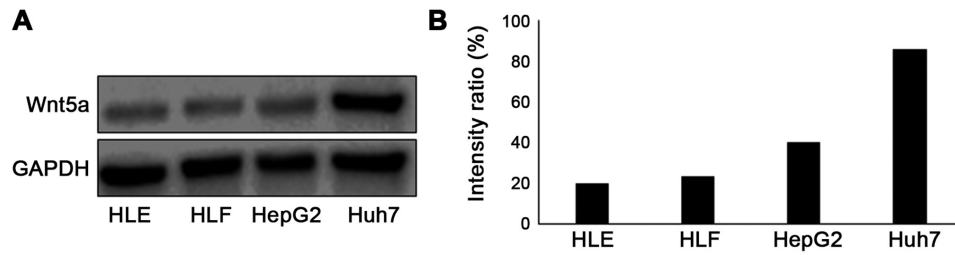

Figure S2. Relative changes of SNAIL, ZEB and TWIST families following overexpression of Wnt5a in HLF cells were examined using a DNA microarray. The expression levels of SNAI2 and SNAI3 were decreased following overexpression of Wnt5a. SNAI, snail family transcriptional repressor; TWIST, twist family bHLH transcription factor; ZEB, zinc finger E-box binding homeobox.

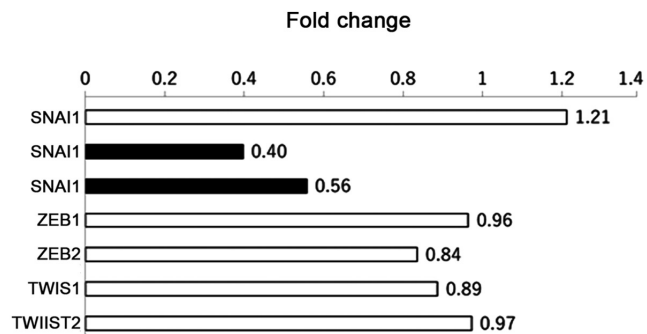

Figure S3. Relative changes of the MMP family following overexpression of Wnt5a in HLF cells were examined using a DNA microarray. The expression levels of MMP2, MMP7, MMP9, MMP10 and MMP23B were decreased following overexpression of Wnt5a. MMP, matrix metalloproteinase.

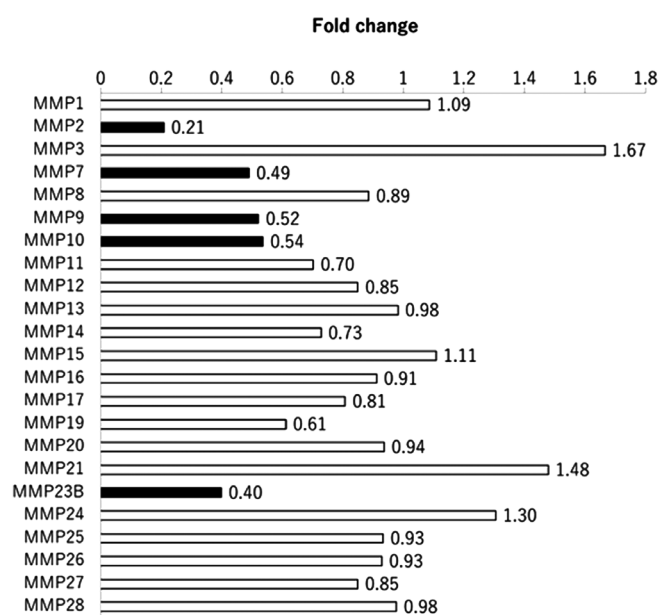

Figure S4. Survival analysis by cytoplasmic Wnt5a expression. (A) OS and (B) RFS curves were generated using the Kaplan-Meier method. OS in the cytoplasmic Wnt5a-negative group was significantly poorer compared with that in the cytoplasmic Wnt5a-positive group ( $P=0.018$ ). There was no significant difference between the groups for RFS ( $P=0.661$ ). (C) Survival analysis using the combination of cytoplasmic and membrane staining patterns. OS in the cytoplasmic and membrane-negative group was significantly poorer compared with that in the positive group ( $P=0.005$ ). There was no significant difference between the other groups. OS, overall survival; RFS, relapse-free survival.

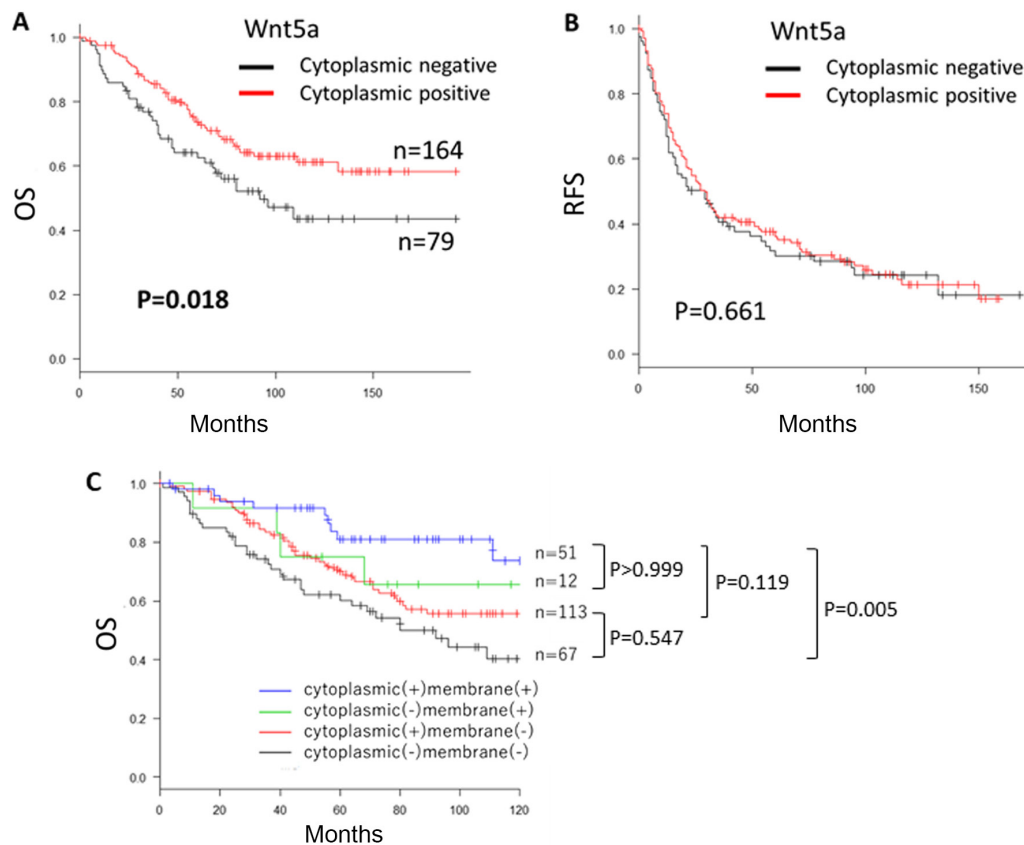

Figure S5. Relative Wnt5a mRNA expression in HLE, HLF, HepG2 and Huh7 cells was examined by reverse transcription-quantitative PCR. The expression levels were compared by the comparative threshold cycle method using GAPDH as an internal control. There was no association between mRNA and protein expression of Wnt5a.

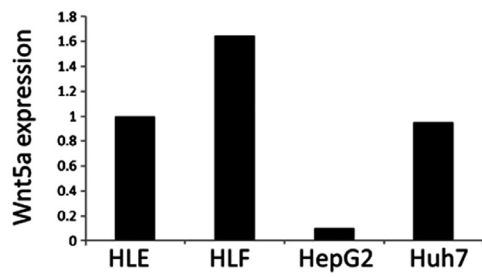

Table SI. Recurrence patterns and its management in Wnt5a-negative (n=133) and Wnt5a-positive (n=38) patients.

| Variable                | Wnt5a expression |           | P-value |
|-------------------------|------------------|-----------|---------|
|                         | Negative         | Positive  |         |
| Location, n (%)         |                  |           |         |
| Intrahepatic            | 107 (80.5)       | 32 (84.2) | 0.813   |
| Extrahepatic            | 16 (12.0)        | 4 (10.5)  | 0.518   |
| Both                    | 9 (6.8)          | 2 (5.3)   | >0.999  |
| Intrahepatic recurrence |                  |           |         |
| Tumor number, n         | 1.97±2.19        | 1.68±1.19 | 0.481   |
| Tumor diameter, cm      | 1.75±0.99        | 1.67±0.70 | 0.668   |
| Management, n (%)       |                  |           |         |
| TACE                    | 46 (35.9)        | 16 (44.4) | 0.437   |
| RFA (MCT, PEIT)         | 38 (29.7)        | 9 (25.0)  | 0.679   |
| Resection               | 19 (14.8)        | 6 (16.7)  | 0.795   |
| Metastatic resection    | 13 (10.2)        | 3 (8.3)   | >0.999  |
| Chemotherapy            | 8 (6.3)          | 1 (2.8)   | 0.685   |
| BSC                     | 4 (3.1)          | 0 (0.0)   | 0.577   |
| Radiotherapy            | 0 (0.0)          | 1 (2.8)   | 0.220   |

TACE, transcatheter arterial chemoembolization; RFA, radiofrequency ablation; MCT, microwave coagulation therapy; PEIT, percutaneous ethanol injection therapy; BSC, best supportive care.

Table SII. Association between cytoplasmic expression levels of Wnt5a and clinicopathological characteristics.

| Characteristics     | Wnt5a expression      |                        | P-value             |
|---------------------|-----------------------|------------------------|---------------------|
|                     | Negative,<br>n (n=79) | Positive,<br>n (n=164) |                     |
| Sex                 |                       |                        |                     |
| Male                | 62                    | 138                    | 0.286               |
| Female              | 17                    | 26                     |                     |
| Age, years          |                       |                        |                     |
| ≤60                 | 35                    | 67                     | 0.678               |
| >60                 | 44                    | 97                     |                     |
| HBV                 |                       |                        |                     |
| Negative            | 45                    | 100                    | 0.576               |
| Positive            | 34                    | 64                     |                     |
| HCV                 |                       |                        |                     |
| Negative            | 45                    | 98                     | 0.679               |
| Positive            | 34                    | 66                     |                     |
| Albumin, g/dl       |                       |                        |                     |
| <4                  | 24                    | 72                     | 0.050               |
| ≥4                  | 55                    | 92                     |                     |
| AFP, ng/ml          |                       |                        |                     |
| ≤10                 | 31                    | 96                     | 0.009 <sup>a</sup>  |
| >10                 | 46                    | 68                     |                     |
| PIVKAI, mAU/ml      |                       |                        |                     |
| ≤40                 | 36                    | 65                     | 0.402               |
| >40                 | 41                    | 95                     |                     |
| Differentiation     |                       |                        |                     |
| Well-moderate       | 52                    | 142                    | <0.001 <sup>a</sup> |
| Poor                | 27                    | 22                     |                     |
| Tumor number        |                       |                        |                     |
| Solitary            | 68                    | 119                    | 0.023 <sup>a</sup>  |
| Multiple            | 11                    | 45                     |                     |
| Tumor size, cm      |                       |                        |                     |
| ≤5                  | 51                    | 114                    | 0.464               |
| >5                  | 28                    | 50                     |                     |
| Vascular invasion   |                       |                        |                     |
| Negative            | 60                    | 144                    | 0.025 <sup>a</sup>  |
| Positive            | 19                    | 20                     |                     |
| Non-cancerous liver |                       |                        |                     |
| Non-cirrhosis       | 52                    | 105                    | 0.886               |
| Cirrhosis           | 27                    | 59                     |                     |

<sup>a</sup>P<0.05. HBV, hepatitis B virus; HCV, hepatitis C virus; NBNC, non-hepatitis B virus and non-hepatitis C virus; AFP, α-fetoprotein; PIVKAI, protein induced by vitamin K absence or antagonist-II.

Table SIII. Univariate and multivariate analysis of prognostic factors for overall survival.

| Characteristics                                       | Univariate analysis |             |                     | Multivariate analysis |             |                    |
|-------------------------------------------------------|---------------------|-------------|---------------------|-----------------------|-------------|--------------------|
|                                                       | HR                  | 95% CI      | P-value             | HR                    | 95% CI      | P-value            |
| Sex (male vs. female)                                 | 1.030               | 0.581-1.823 | 0.921               |                       |             |                    |
| Age (>60 vs. ≤60 years)                               | 1.426               | 0.926-2.196 | 0.107               |                       |             |                    |
| HBV (positive vs. negative)                           | 0.873               | 0.569-1.339 | 0.533               |                       |             |                    |
| HCV (positive vs. negative)                           | 1.132               | 0.743-1.724 | 0.565               |                       |             |                    |
| AFP (>10 vs. ≤10 ng/ml)                               | 1.668               | 1.090-2.553 | 0.018 <sup>a</sup>  | 1.447                 | 0.923-2.270 | 0.108              |
| PIVKAI (II) (>40 vs. ≤40 mAU/ml)                      | 1.570               | 1.002-2.459 | 0.049 <sup>a</sup>  | 1.546                 | 0.931-2.566 | 0.092              |
| Albumin (<4 vs. ≤4 g/dl)                              | 1.826               | 1.204-2.770 | 0.005 <sup>a</sup>  | 1.554                 | 0.991-2.437 | 0.055              |
| Tumor number (multiple vs. solitary)                  | 1.824               | 1.134-2.932 | 0.013 <sup>a</sup>  | 2.040                 | 1.236-3.367 | 0.005 <sup>a</sup> |
| Tumor size (>5 vs. ≤5 cm)                             | 2.110               | 1.384-3.218 | 0.001 <sup>a</sup>  | 1.673                 | 1.016-2.753 | 0.043 <sup>a</sup> |
| Vascular invasion (positive vs. negative)             | 2.630               | 1.645-4.205 | <0.001 <sup>a</sup> | 2.351                 | 1.375-4.020 | 0.002 <sup>a</sup> |
| Differentiation (poor vs. well + moderate)            | 1.361               | 0.826-2.241 | 0.226               |                       |             |                    |
| Non-cancerous liver (cirrhosis vs. non-cirrhosis)     | 1.721               | 1.130-2.623 | 0.012 <sup>a</sup>  | 1.566                 | 1.005-2.440 | 0.047 <sup>a</sup> |
| Wnt5a (cytoplasmic negative vs. cytoplasmic positive) | 1.656               | 1.086-2.525 | 0.019 <sup>a</sup>  | 1.520                 | 0.953-2.422 | 0.078              |

<sup>a</sup>P<0.05. HBV, hepatitis B virus; HCV, hepatitis C virus; NBNC, non-hepatitis B virus and non-hepatitis C virus; AFP, α-fetoprotein; PIVKAI (II), protein induced by vitamin K absence or antagonist-II; HR, hazard ratio.
